# Supplementary material
Source: PubMed Central journal article supplement (PMC3516866)
Supplement: pr3007123_si_001.pdf [file pr3007123_si_001.pdf]

**Supplementary Table 1.** Number of peptides unmatched, mismatched and correctly matched at various significance levels by X!Tandem, OMSSA and Crux for precursor charge states +1, +2, and +3 when all ions in the query are available including neutral mass losses

| Significance <sup>a</sup> | OMSSA           |       |       | X!Tandem |       |       | Crux  |       |       |
|---------------------------|-----------------|-------|-------|----------|-------|-------|-------|-------|-------|
|                           | +1 <sup>e</sup> | +2    | +3    | +1       | +2    | +3    | +1    | +2    | +3    |
| Unmatched <sup>b</sup>    | 1               | 1     | 1     | 69       | 67    | 63    | 0     | 0     | 0     |
| Mismatch <sup>c</sup>     | 0               | 0     | 1     | 16       | 18    | 22    | 0     | 0     | 0     |
| 0                         | 0               | 0     | 0     | 4        | 6     | 5     | 1     | 5     | 1     |
| 1                         | 1               | 2     | 4     | 73       | 67    | 72    | 118   | 131   | 109   |
| 2                         | 11              | 19    | 42    | 91       | 88    | 91    | 214   | 209   | 237   |
| 3                         | 48              | 52    | 34    | 82       | 79    | 82    | 171   | 165   | 146   |
| 4                         | 24              | 13    | 33    | 33       | 41    | 33    | 160   | 150   | 151   |
| 5                         | 24              | 34    | 59    | 75       | 74    | 74    | 151   | 172   | 170   |
| 6                         | 49              | 57    | 54    | 91       | 85    | 89    | 172   | 170   | 170   |
| 7                         | 73              | 58    | 40    | 83       | 78    | 77    | 171   | 179   | 182   |
| 8                         | 28              | 27    | 336   | 47       | 59    | 51    | 194   | 179   | 189   |
| >=9                       | 7591            | 7587  | 7246  | 7186     | 7188  | 7191  | 6498  | 6490  | 6495  |
| Prop >6 <sup>d</sup>      | 98.6%           | 98.5% | 97.8% | 94.4%    | 94.4% | 94.4% | 89.6% | 89.4% | 89.6% |

<sup>a</sup> Significance threshold (t) for matched to be considered significant at *E*- or *p*-value < 1 x 10<sup>-t</sup>.

<sup>b</sup> Unmatched: the program does not provide a match with the program setting.

<sup>c</sup> Mismatched: the program provided an incorrect match.

<sup>d</sup> Percentage of the matches that have *E*- or *p*-value < 1 x 10<sup>-6</sup>.

<sup>e</sup> Peptide charge state.

**Supplementary Table 2.** Number of peptides unmatched, mismatched and correctly matched at various significance levels by X!Tandem, OMSSA and Crux for precursor charge states +1, +2, and +3 when all ions in the query are available excluding neutral mass losses

| Significance <sup>a</sup> | OMSSA           |       |       | X!Tandem |       |       | Crux  |       |       |
|---------------------------|-----------------|-------|-------|----------|-------|-------|-------|-------|-------|
|                           | +1 <sup>e</sup> | +2    | +3    | +1       | +2    | +3    | +1    | +2    | +3    |
| Unmatched <sup>b</sup>    | 0               | 0     | 0     | 115      | 116   | 118   | 0     | 0     | 0     |
| Mismatched <sup>c</sup>   | 0               | 0     | 0     | 11       | 13    | 17    | 0     | 0     | 0     |
| 0                         | 0               | 0     | 0     | 2        | 4     | 3     | 1     | 5     | 2     |
| 1                         | 0               | 1     | 1     | 73       | 70    | 72    | 129   | 153   | 124   |
| 2                         | 1               | 0     | 2     | 93       | 90    | 93    | 236   | 228   | 233   |
| 3                         | 2               | 5     | 6     | 80       | 81    | 80    | 226   | 193   | 171   |
| 4                         | 10              | 30    | 78    | 30       | 32    | 33    | 178   | 175   | 140   |
| 5                         | 75              | 52    | 6     | 69       | 71    | 67    | 170   | 163   | 151   |
| 6                         | 4               | 7     | 4     | 95       | 90    | 94    | 172   | 186   | 159   |
| 7                         | 5               | 3     | 63    | 74       | 76    | 74    | 213   | 190   | 198   |
| 8                         | 63              | 68    | 79    | 13       | 17    | 13    | 200   | 245   | 207   |
| >=9                       | 7690            | 7684  | 7611  | 7195     | 7190  | 7186  | 6325  | 6312  | 6465  |
| Prop >6 <sup>d</sup>      | 98.9%           | 98.9% | 98.8% | 94.0%    | 93.9% | 93.8% | 88.0% | 88.3% | 89.5% |

<sup>a</sup> Significance threshold (t) for matched to be considered significant at  $E$ - or  $p$ -value  $< 1 \times 10^{-t}$ .

<sup>b</sup> Unmatched: the program does not provide a match with the program setting.

<sup>c</sup> Mismatched: the program provided an incorrect match.

<sup>d</sup> Percentage of the matches that have  $E$ - or  $p$ -value  $< 1 \times 10^{-6}$ .

<sup>e</sup> Peptide charge state.

**Supplementary Table 3.** Number of peptides unmatched, mismatched and correctly matched at various significance levels by X!Tandem, OMSSA and Crux for precursor charge states +1, +2, and +3 when only *b*-ions in the query are available including neutral mass losses

| Significance <sup>a</sup> | OMSSA           |       |       | X!Tandem |       |       | Crux  |       |       |
|---------------------------|-----------------|-------|-------|----------|-------|-------|-------|-------|-------|
|                           | +1 <sup>e</sup> | +2    | +3    | +1       | +2    | +3    | +1    | +2    | +3    |
| Unmatched <sup>b</sup>    | 0               | 0     | 0     | 79       | 76    | 75    | 0     | 0     | 0     |
| Mismatched <sup>c</sup>   | 0               | 0     | 0     | 6        | 9     | 10    | 0     | 0     | 0     |
| 0                         | 160             | 179   | 234   | 237      | 237   | 240   | 0     | 4     | 2     |
| 1                         | 84              | 94    | 100   | 109      | 110   | 107   | 93    | 99    | 105   |
| 2                         | 87              | 82    | 89    | 149      | 147   | 145   | 229   | 249   | 214   |
| 3                         | 100             | 100   | 112   | 122      | 123   | 125   | 215   | 175   | 175   |
| 4                         | 94              | 92    | 83    | 96       | 97    | 97    | 154   | 161   | 157   |
| 5                         | 90              | 89    | 84    | 105      | 105   | 104   | 167   | 173   | 153   |
| 6                         | 64              | 57    | 119   | 137      | 137   | 134   | 188   | 195   | 166   |
| 7                         | 94              | 111   | 83    | 104      | 101   | 104   | 167   | 160   | 195   |
| 8                         | 93              | 75    | 95    | 89       | 93    | 90    | 168   | 170   | 220   |
| >=9                       | 6984            | 6971  | 6851  | 6617     | 6615  | 6619  | 6469  | 6464  | 6463  |
| Prop >6 <sup>d</sup>      | 92.2%           | 91.9% | 91.1% | 88.5%    | 88.5% | 88.5% | 89.1% | 89.0% | 89.7% |

<sup>a</sup> Significance threshold (*t*) for matched to be considered significant at *E*- or *p*-value < 1 x 10<sup>-*t*</sup>.

<sup>b</sup> Unmatched: the program does not provide a match with the program setting.

<sup>c</sup> Mismatched: the program provided an incorrect match.

<sup>d</sup> Percentage of the matches that have *E*- or *p*-value < 1 x 10<sup>-6</sup>.

<sup>e</sup> Peptide charge state.

**Supplementary Table 4.** Number of peptides unmatched, mismatched and correctly matched at various significance levels by X!Tandem, OMSSA and Crux for precursor charge states +1, +2, and +3 when only *y*-ions in the query are available including neutral mass losses

| Significance <sup>a</sup> | OMSSA           |       |       | X!Tandem |       |       | Crux  |       |       |
|---------------------------|-----------------|-------|-------|----------|-------|-------|-------|-------|-------|
|                           | +1 <sup>e</sup> | +2    | +3    | +1       | +2    | +3    | +1    | +2    | +3    |
| Unmatched <sup>b</sup>    | 0               | 0     | 0     | 72       | 69    | 66    | 0     | 0     | 0     |
| Mismatched <sup>c</sup>   | 0               | 0     | 1     | 15       | 17    | 20    | 0     | 0     | 0     |
| 0                         | 48              | 55    | 95    | 138      | 135   | 138   | 2     | 8     | 7     |
| 1                         | 62              | 76    | 96    | 113      | 109   | 112   | 131   | 140   | 135   |
| 2                         | 86              | 86    | 104   | 156      | 161   | 155   | 196   | 190   | 186   |
| 3                         | 99              | 99    | 95    | 113      | 112   | 116   | 155   | 171   | 161   |
| 4                         | 88              | 86    | 98    | 98       | 94    | 99    | 169   | 149   | 171   |
| 5                         | 89              | 91    | 74    | 109      | 108   | 106   | 140   | 158   | 167   |
| 6                         | 77              | 79    | 90    | 139      | 143   | 138   | 173   | 157   | 193   |
| 7                         | 73              | 70    | 96    | 105      | 109   | 106   | 196   | 185   | 228   |
| 8                         | 90              | 99    | 110   | 103      | 103   | 104   | 226   | 226   | 257   |
| >=9                       | 7138            | 7109  | 6991  | 6689     | 6690  | 6690  | 6462  | 6466  | 6345  |
| Prop >6 <sup>b</sup>      | 94.0%           | 93.7% | 92.8% | 89.6%    | 89.7% | 89.7% | 89.9% | 89.6% | 89.5% |

<sup>a</sup> Significance threshold (*t*) for matched to be considered significant at *E*- or *p*-value < 1 x 10<sup>-t</sup>.

<sup>b</sup> Unmatched: the program does not provide a match with the program setting.

<sup>c</sup> Mismatched: the program provided an incorrect match.

<sup>d</sup> Percentage of the matches that have *E*- or *p*-value < 1 x 10<sup>-6</sup>.

<sup>e</sup> Peptide charge state.

**Supplementary Table 5.** Number of peptides unmatched, mismatched and correctly matched at various significance levels by X!Tandem, OMSSA and Crux for precursor charge states +1, +2, and +3 when only random 50% of all ions in the query are available including neutral mass losses

| Significance <sup>a</sup> | OMSSA           |       |       | X!Tandem |       |       | Crux  |       |       |
|---------------------------|-----------------|-------|-------|----------|-------|-------|-------|-------|-------|
|                           | +1 <sup>e</sup> | +2    | +3    | +1       | +2    | +3    | +1    | +2    | +3    |
| Unmatched <sup>b</sup>    | 1               | 0     | 0     | 73       | 75    | 66    | 0     | 0     | 0     |
| Mismatched <sup>c</sup>   | 0               | 0     | 0     | 13       | 11    | 19    | 0     | 0     | 0     |
| 0                         | 71              | 88    | 136   | 316      | 296   | 313   | 9     | 10    | 11    |
| 1                         | 72              | 77    | 86    | 170      | 166   | 159   | 151   | 169   | 167   |
| 2                         | 85              | 69    | 98    | 133      | 147   | 145   | 243   | 241   | 208   |
| 3                         | 87              | 91    | 101   | 166      | 181   | 172   | 188   | 188   | 187   |
| 4                         | 106             | 99    | 96    | 104      | 107   | 109   | 180   | 151   | 148   |
| 5                         | 88              | 92    | 97    | 157      | 157   | 160   | 188   | 196   | 179   |
| 6                         | 81              | 95    | 106   | 109      | 96    | 95    | 190   | 198   | 213   |
| 7                         | 86              | 83    | 89    | 122      | 144   | 139   | 209   | 208   | 244   |
| 8                         | 74              | 92    | 92    | 127      | 117   | 111   | 244   | 230   | 235   |
| >=9                       | 7099            | 7064  | 6949  | 6360     | 6353  | 6362  | 6248  | 6259  | 6258  |
| Prop >6 <sup>d</sup>      | 93.5%           | 93.4% | 92.2% | 85.6%    | 85.5% | 85.4% | 87.8% | 87.8% | 88.5% |

<sup>a</sup> Significance threshold ( $t$ ) for matched to be considered significant at  $E$ - or  $p$ -value  $< 1 \times 10^{-t}$ .

<sup>b</sup> Unmatched: the program does not provide a match with the program setting.

<sup>c</sup> Mismatched: the program provided an incorrect match.

<sup>d</sup> Percentage of the matches that have  $E$ - or  $p$ -value  $< 1 \times 10^{-6}$ .

<sup>e</sup> Peptide charge state.

**Supplementary Table 6.** Number of peptides unmatched, mismatched and correctly matched at various significance levels by X!Tandem, OMSSA and Crux for precursor charge states +1, +2, and +3 when only random 25% of all ions in the query are available including neutral mass losses

| Significance <sup>a</sup> | OMSSA           |       |       | X!Tandem |       |       | Crux  |       |       |
|---------------------------|-----------------|-------|-------|----------|-------|-------|-------|-------|-------|
|                           | +1 <sup>e</sup> | +2    | +3    | +1       | +2    | +3    | +1    | +2    | +3    |
| Unmatched <sup>b</sup>    | 73              | 60    | 63    | 295      | 312   | 311   | 0     | 0     | 0     |
| Mismatched <sup>c</sup>   | 4               | 0     | 1     | 10       | 10    | 13    | 0     | 0     | 0     |
| 0                         | 492             | 512   | 506   | 1133     | 1113  | 1115  | 60    | 71    | 80    |
| 1                         | 182             | 177   | 170   | 284      | 292   | 280   | 322   | 322   | 298   |
| 2                         | 184             | 194   | 189   | 228      | 228   | 250   | 302   | 306   | 244   |
| 3                         | 178             | 188   | 169   | 229      | 227   | 225   | 218   | 226   | 183   |
| 4                         | 160             | 143   | 171   | 140      | 128   | 131   | 183   | 182   | 236   |
| 5                         | 167             | 156   | 139   | 136      | 153   | 139   | 209   | 211   | 274   |
| 6                         | 133             | 147   | 154   | 120      | 110   | 130   | 273   | 236   | 285   |
| 7                         | 113             | 124   | 124   | 146      | 130   | 132   | 326   | 318   | 312   |
| 8                         | 106             | 100   | 125   | 131      | 126   | 112   | 365   | 378   | 434   |
| >=9                       | 6058            | 6049  | 6039  | 4998     | 5021  | 5012  | 5592  | 5600  | 5504  |
| Prop >6 <sup>d</sup>      | 81.7%           | 81.8% | 82.1% | 68.7%    | 68.6% | 68.6% | 83.5% | 83.2% | 83.2% |

<sup>a</sup> Significance threshold (t) for matched to be considered significant at  $E$ - or  $p$ -value  $< 1 \times 10^{-t}$ .

<sup>b</sup> Unmatched: the program does not provide a match with the program setting.

<sup>c</sup> Mismatched: the program provided an incorrect match.

<sup>d</sup> Percentage of the matches that have  $E$ - or  $p$ -value  $< 1 \times 10^{-6}$ .

<sup>e</sup> Peptide charge state.

**Supplementary Table 7.** Performance of OMSSA and X!Tandem in the identification of peptides with precursor charge states +1, +2, and +3 by match significance levels when the *b*-ion series is scored

| Significance <sup>a</sup> | OMSSA           |       |       | X!Tandem |       |       |
|---------------------------|-----------------|-------|-------|----------|-------|-------|
|                           | +1 <sup>e</sup> | +2    | +3    | +1       | +2    | +3    |
| Unmatched <sup>b</sup>    | 415             | 396   | 373   | 75       | 75    | 71    |
| Mismatched <sup>c</sup>   | 11              | 30    | 54    | 10       | 10    | 14    |
| 0                         | 122             | 141   | 171   | 248      | 249   | 249   |
| 1                         | 63              | 64    | 89    | 113      | 113   | 115   |
| 2                         | 76              | 65    | 80    | 187      | 195   | 190   |
| 3                         | 76              | 89    | 106   | 270      | 292   | 298   |
| 4                         | 103             | 95    | 88    | 746      | 851   | 854   |
| 5                         | 62              | 70    | 118   | 1902     | 1800  | 1788  |
| 6                         | 102             | 118   | 110   | 1536     | 1471  | 1471  |
| 7                         | 108             | 105   | 99    | 842      | 868   | 878   |
| 8                         | 116             | 95    | 114   | 690      | 699   | 691   |
| >=9                       | 6596            | 6582  | 6448  | 1231     | 1227  | 1231  |
| Prop >6 <sup>d</sup>      | 88.2%           | 87.9% | 86.3% | 54.8%    | 54.3% | 54.4% |

<sup>a</sup> Significance threshold (*t*) for matched to be considered significant at *E*- or *p*-value < 1 x 10<sup>-*t*</sup>.

<sup>b</sup> Unmatched: the program does not provide a match with the program setting.

<sup>c</sup> Mismatched: the program provided an incorrect match.

<sup>d</sup> Percentage of the matches that have *E*- or *p*-value < 1 x 10<sup>-6</sup>.

<sup>e</sup> Peptide charge state.

**Supplementary Table 8.** Performance of OMSSA and X!Tandem in the identification of peptides with precursor charge states +1, +2, and +3 by match significance levels when the y-ion series is scored

| Significance <sup>a</sup> | OMSSA           |       |       | X!Tandem |       |       |
|---------------------------|-----------------|-------|-------|----------|-------|-------|
|                           | +1 <sup>e</sup> | +2    | +3    | +1       | +2    | +3    |
| Unmatched <sup>b</sup>    | 365             | 361   | 355   | 74       | 70    | 70    |
| Mismatched <sup>c</sup>   | 11              | 15    | 34    | 11       | 15    | 15    |
| 0                         | 47              | 60    | 79    | 151      | 145   | 152   |
| 1                         | 50              | 51    | 69    | 108      | 108   | 110   |
| 2                         | 69              | 67    | 77    | 179      | 186   | 183   |
| 3                         | 66              | 73    | 92    | 214      | 234   | 241   |
| 4                         | 87              | 86    | 103   | 591      | 688   | 693   |
| 5                         | 81              | 89    | 93    | 1785     | 1857  | 1853  |
| 6                         | 90              | 84    | 113   | 1948     | 1794  | 1786  |
| 7                         | 80              | 95    | 118   | 861      | 841   | 830   |
| 8                         | 126             | 122   | 97    | 648      | 613   | 620   |
| >=9                       | 6778            | 6747  | 6620  | 1280     | 1299  | 1297  |
| Prop >6 <sup>d</sup>      | 90.1%           | 89.8% | 88.5% | 60.3%    | 57.9% | 57.7% |

<sup>a</sup> Significance threshold (t) for matched to be considered significant at *E*- or *p*-value < 1 x 10<sup>-t</sup>.

<sup>b</sup> Unmatched: the program does not provide a match with the program setting.

<sup>c</sup> Mismatched: the program provided an incorrect match.

<sup>d</sup> Percentage of the matches that have *E*- or *p*-value < 1 x 10<sup>-6</sup>.

<sup>e</sup> Peptide charge state.



**Supplementary Table 9.** Performance of OMSSA and X!Tandem in the identification of peptides with precursor charge states +1, +2, and +3, by ion series scored

| Correctly matched <sup>a</sup> | Significance threshold <sup>b</sup> | <i>b</i> -ion series scored |      |      | <i>y</i> -ion series scored |      |      |
|--------------------------------|-------------------------------------|-----------------------------|------|------|-----------------------------|------|------|
|                                |                                     | +1 <sup>c</sup>             | +2   | +3   | +1                          | +2   | +3   |
| Both                           | Both                                | 4003                        | 3974 | 3980 | 4459                        | 4288 | 4270 |
| Both                           | OMSSA                               | 2919                        | 2926 | 2791 | 2615                        | 2760 | 2678 |
| Both                           | X!Tandem                            | 0                           | 0    | 3    | 0                           | 0    | 1    |
| Both                           | None                                | 438                         | 460  | 587  | 331                         | 357  | 443  |
| X!Tandem                       | X!Tandem                            | 177                         | 186  | 184  | 156                         | 147  | 151  |
| X!Tandem                       | None                                | 228                         | 219  | 220  | 204                         | 213  | 222  |
| OMSSA                          | None                                | 64                          | 64   | 64   | 69                          | 69   | 69   |
| None                           | None                                | 21                          | 21   | 21   | 16                          | 16   | 16   |

<sup>a</sup> Both: OMSSA and X!Tandem both correctly identified the peptide; OMSSA: only OMSSA correctly identified the peptide; X!Tandem: only X!Tandem correctly identified the peptide; None: Neither OMSSA and X!Tandem correctly identified the peptide.

<sup>b</sup> Both: OMSSA and X!Tandem *E*-values were both  $< 1 \times 10^{-6}$ ; OMSSA: only OMSSA *E*-value was  $< 1 \times 10^{-6}$ ; X!Tandem: only X!Tandem *E*-value was  $< 1 \times 10^{-6}$ ; None: Neither OMSSA and X!Tandem *E*-value was  $< 1 \times 10^{-6}$ .

<sup>c</sup> Peptide charge state.
